# Supplementary material
Source: MDPI journal article supplement (https://www.mdpi.com/1424-8247/16/12/1688)
Supplement: s1 [file s1]

MOUSE\_COX1-----MSRRSLSWFPLLLLLLLPPTPSVILLADGVPSPVNPCYYPCQNQGVCVRFGLDNYQCD 60  
6Y3C\_1-----ADPGAPTPVNPCYYPCQHGGICVRFGLDRYQCD 34  
1EQG\_1-----PVFSADPGAPAPVNPCYYPCQHGGICVRFGLDRYQCD 38  
2OYU\_1-----MSRQSISLRFPLLLLLLSP--SPVFSADPGAPAPVNPCYYPCQHGGICVRFGLDRYQCD 58  
3KK6\_1-----PVNPCCYYPCQHGGICVRFGLDRYQCD 27  
4O1Z\_1-----PVNPCCYYPCQHGGICVRFGLDRYQCD 27  
  
\*\*\*\*\*;\*:\*\*\*\*\*.\*\*\*  
MOUSE\_COX1-----CTRTGYSGPNCTIPEIWTLWRNSLRPSPSFTHFLLTHGYWLWFEVFNATFIREVLMLRLVLT 120  
6Y3C\_1-----CTRTGYSGPNCTIPGLWTWLRNSLRPSPSFTHFLLTHGRWFWEVFNATFIREMLMLRLVLT 94  
1EQG\_1-----CTRTGYSGPNCTIPEIWTWLRNTRLRPSPSFIHFLLLTHGRWLWDFVNATFIRDITLMRLVLT 98  
2OYU\_1-----CTRTGYSGPNCTIPEIWTWLRRTLRLRPSPSFIHFLLLTHGRWLWDFVNATFIRDITLMRLVLT 118  
3KK6\_1-----CTRTGYSGPNCTIPEIWTWLRRTLRLRPSPSFIHFLLLTHGRWLWDFVNATFIRDITLMRLVLT 87  
4O1Z\_1-----CTRTGYSGPNCTIPEIWTWLRRTLRLRPSPSFIHFLLLTHGRWLWDFVNATFIRDITLMRLVLT 87  
  
\*\*\*\*\*;\*\*\*\*\*.\*\*\*\*\* \*;\*:\*\*\*\*\*.\*\*\*\*\*  
MOUSE\_COX1-----VRSNLIPSPTYNSAHDYISWESFSNVSYTIRILPSVPKDCPTPMGTGKGKQLPDVQLLA 180  
6Y3C\_1-----VRSNLIPSPTYNSAHDYISWESFSNVSYTIRILPSVPKDCPTPMGTGKGKQLPDAQLLA 154  
1EQG\_1-----VRSNLIPSPTYNIAHDYISWESFSNVSYTIRILPSVPRDCPTPMGTGKGKQLPDAEFLS 158  
2OYU\_1-----VRSNLIPSPTYNIAHDYISWESFSNVSYTIRILPSVPRDCPTPMGTGKGKQLPDAEFLS 178  
3KK6\_1-----VRSNLIPSPTYNIAHDYISWESFSNVSYTIRILPSVPRDCPTPMGTGKGKQLPDAEFLS 147  
4O1Z\_1-----VRSNLIPSPTYNIAHDYISWESFSNVSYTIRILPSVPRDCPTPMGTGKGKQLPDAEFLS 147  
  
\*\*\*\*\* \*\*\*\*\*;\*\*\*\*\*.\*\*\*\*\*  
MOUSE\_COX1-----QQLLLRREFIPAPQGTNILFAFFAQHFTHQFFKTSGKMGPGFTKALGHGVDLGHIYGDNL 240  
6Y3C\_1-----RRFLLRRKFIPDPQGTNLMFAFFAQHFTHQFFKTSGKMGPGFTKALGHGVDLGHIYGDNL 214  
1EQG\_1-----RRFLLRRKFIPDPQGTNLMFAFFAQHFTHQFFKTSGKMGPGFTKALGHGVDLGHIYGDNL 218  
2OYU\_1-----RRFLLRRKFIPDPQGTNLMFAFFAQHFTHQFFKTSGKMGPGFTKALGHGVDLGHIYGDNL 208  
3KK6\_1-----RRFLLRRKFIPDPQGTNLMFAFFAQHFTHQFFKTSGKMGPGFTKALGHGVDLGHIYGDNL 237  
4O1Z\_1-----RRFLLRRKFIPDPQGTNLMFAFFAQHFTHQFFKTSGKMGPGFTKALGHGVDLGHIYGDNL 207  
  
:::\*\*\*\*:\* \*\* \*:\*\*\*\*\*  
MOUSE\_COX1-----ERQYHLRLFKDGKLKYQVLDGEVYPSPVEQASVLMRYPPGVPPERQMAGVQEVEFGLLPGL 300  
6Y3C\_1-----ERQYQLRLFKDGKLKYQVLDGEMYPPSVEEAPVLMHYPRGIIPPQSQMAVGQEVEFGLLPGL 274  
1EQG\_1-----ERQYQLRLFKDGKLKYQMLNGEVYPPSVEEAPVLMHYPRGIIPPQSQMAVGQEVEFGLLPGL 278  
2OYU\_1-----ERQYQLRLFKDGKLKYQMLNGEVYPPSVEEAPVLMHYPRGIIPPQSQMAVGQEVEFGLLPGL 298  
3KK6\_1-----ERQYQLRLFKDGKLKYQMLNGEVYPPSVEEAPVLMHYPRGIIPPQSQMAVGQEVEFGLLPGL 267  
4O1Z\_1-----ERQYQLRLFKDGKLKYQMLNGEVYPPSVEEAPVLMHYPRGIIPPQSQMAVGQEVEFGLLPGL 267  
  
\*\*\*\*\*;\*:\*\*\*\*\*;\* \*\* \*:\*\*\*\*\*  
MOUSE\_COX1-----MLFSTIWLREHNRVCDLLKEEHPTWDEQLFQTARLILIGETIKIVIEEYVQQLSGYFLQ 360  
6Y3C\_1-----MLYATLWLREHNRVCDLLKAHEHPTWGDEQLFQTARLILIGETIKIVIEEYVQQLSGYFLQ 334  
1EQG\_1-----MLYATIWLREHNRVCDLLKAHEHPTWGDEQLFQTARLILIGETIKIVIEEYVQQLSGYFLQ 338  
2OYU\_1-----MLYATIWLREHNRVCDLLKAHEHPTWGDEQLFQTARLILIGETIKIVIEEYVQQLSGYFLQ 358  
3KK6\_1-----MLYATIWLREHNRVCDLLKAHEHPTWGDEQLFQTARLILIGETIKIVIEEYVQQLSGYFLQ 327  
4O1Z\_1-----MLYATIWLREHNRVCDLLKAHEHPTWGDEQLFQTARLILIGETIKIVIEEYVQQLSGYFLQ 327  
  
\*\*,:\*:\*\*\*\*\* \*\*\*\*\*.\*\*\*\*\*  
MOUSE\_COX1-----LKFDPELLFRAQFYQRNRRIAMEFNHLYHHWPLMPNSFQVGSQYESYEQLFNNTSMMLVDYG 420  
6Y3C\_1-----LKFDPELLFGVFQFYQRNRRIAMEFNHLYHHWPLMPDSFKVGSQYESYEQLFNNTSMMLVDYG 394  
1EQG\_1-----LKFDPELLFGAQFYQRNRRIAMFNQLYHHWPLMPDSFRVGPQDYSYEQLFNNTSMMLVDYG 398  
2OYU\_1-----LKFDPELLFGAQFYQRNRRIAMFNQLYHHWPLMPDSFRVGPQDYSYEQLFNNTSMMLVDYG 418  
3KK6\_1-----LKFDPELLFGAQFYQRNRRIAMFNQLYHHWPLMPDSFRVGPQDYSYEQLFNNTSMMLVDYG 387  
4O1Z\_1-----LKFDPELLFGAOFQYRNRIAMEFNQLYHHWPLMPDSFRVGPQDYSYEQLFNNTSMMLVDYG 387

```

***** .*****:*****:*.** *:*****
MOUSE_COX1-----VEALVDAFSRQAGRIIGGRNFDYHVLHVAVDVIKESREMRLQPPFNEYRKRFGKLPYTSF 480
6Y3C_1-----VEALVDAFSRQIAGRIIGGRNMDHHILHVAVDVIREMRLQPPFNEYRKRFGMKPYTSF 454
1EQG_1-----VEALVDAFSRQAGRIIGGRNIDHHILHVAVDVIKESRVLRLQPPFNEYRKRFGMKPYTSF 458
2OYU_1-----VEALVDAFSRQAGRIIGGRNIDHHILHVAVDVIKESRVLRLQPPFNEYRKRFGMKPYTSF 478
3KK6_1-----VEALVDAFSRQAGRIIGGRNIDHHILHVAVDVIKESRVLRLQPPFNEYRKRFGMKPYTSF 447
4O1Z_1-----VEALVDAFSRQAGRIIGGRNIDHHILHVAVDVIKESRVLRLQPPFNEYRKRFGMKPYTSF 447
***** *****:*.**:*****:*** :*****:*****
MOUSE_COX1-----QELTGEKEMAAELEEYGDIDALEFYPGLLLEKCHPNSIFGESMIEMGAPFSLKGLLGNP 540
6Y3C_1-----QELVGEKEMAAELEEYGDIDALEFYPGLLLEKCHPNSIFGESMIEMGAPFSLKGLLGNP 514
1EQG_1-----QELTGEKEMAAELEEYGDIDALEFYPGLLLEKCHPNSIFGESMIEMGAPFSLKGLLGNP 518
2OYU_1-----QELTGEKEMAAELEEYGDIDALEFYPGLLLEKCHPNSIFGESMIEMGAPFSLKGLLGNP 538
3KK6_1-----QELTGEKEMAAELEEYGDIDALEFYPGLLLEKCHPNSIFGESMIEMGAPFSLKGLLGNP 507
4O1Z_1-----QELTGEKEMAAELEEYGDIDALEFYPGLLLEKCHPNSIFGESMIEMGAPFSLKGLLGNP 507
***.*****:*****:*****:*****:*****
MOUSE_COX1-----ICSPYWKPSTFGGVDGFNLVNTASLKKLVCLNTKTCPVVSFRVPDYPGDDGSVLVRST 600
6Y3C_1-----ICSPYWKPSTFGGEVGFNIVKTATLKKLVCLNTKTCPVVSFRVPDASQDDGPAVERPST 574
1EQG_1-----ICSPYWKASTFGGEVGFNLVKATLKKLVCLNTKTCPVVSFHVDPDRQEDRPGVERPPT 578
2OYU_1-----ICSPYWKASTFGGEVGFNLVKATLKKLVCLNTKTCPVVSFHVDPDRQEDRPGVERPPT 598
3KK6_1-----ICSPYWKASTFGGEVGFNLVKATLKKLVCLNTKTCPVVSFHVDP----- 553
4O1Z_1-----ICSPYWKASTFGGEVGFNLVKATLKKLVCLNTKTCPVVSFHVDPDRQEDRPGVERPPT 567
***** *****:*****:*.**:*****:*****:***
MOUSE_COX1_SEQUENCE      EL      602
6Y3C_1|Chain              EL      576
1EQG_1|Chains             EL      580
2OYU_1|Chain              EL      600
3KK6_1|Chains             --      553
4O1Z_1|Chains             EL      569

```

**Figure S1.** Comparative sequence analysis for COX-1. The aminoacid residues inside box line black

```

Human_cox2-----MLARALLLCAVLALSHTANPCCSHPCQNRGVCMSVGFDDQYKCDCTRTGFYGENCTTPEFL 60
SHEEP_COX2-----MLARALLLCAVALCGAANPCCSHPCQNRGVCMSVGFDDQYKCDCTRTGFYGENCTTPEFL 60
4PH9_1-----HHPCCSNPCQNRGECMSTGFDQYKCDCTRTGFYGENCTTPEFL 43
4COX_1-----ANPCCSNPCQNRGECMSTGFDQYKCDCTRTGFYGENCTTPEFL 43
3LN1_1-----ANPCCSNPCQNRGECMSTGFDQYKCDCTRTGFYGENCTTPEFL 43
4M11_1-----ANPCCSNPCQNRGECMSTGFDQYKCDCTRTGFYGENCTTPEFL 43
:****:***** ***.*****:*****:*****
Human_cox2-----TRIKLFLKPTPNTVHYILTHFKGFVNIVNNIPFLRNAIMSYVLTSRSHLIDSPPTYNADY 120
SHEEP_COX2-----TRIKLLLKPTPDVHYILTHFKGVNIVNNKISFLRMIMRYVLTSRSHLIESPPTYNVHY 120
4PH9_1-----TRIKLLLKPTPNTVHYILTHFKGVNIVNNIPFLRLIMKYVLTSRSYLIDSPPTYNVHY 103
4COX_1-----TRIKLLLKPTPNTVHYILTHFKGVNIVNNIPFLRLIMKYVLTSRSYLIDSPPTYNVHY 103
3LN1_1-----TRIKLLLKPTPNTVHYILTHFKGVNIVNNIPFLRLIMKYVLTSRSYLIDSPPTYNVHY 103
4M11_1-----TRIKLLLKPTPNTVHYILTHFKGVNIVNNIPFLRLIMKYVLTSRSYLIDSPPTYNVHY 103
*****:*****:*****:*****:*****:*****:*****
Human_cox2-----GYKSWEAFSNLSYYTRALPPVDDCPTPLGVKGGKQLPDSNEIVEKLLLRKFIPDPQGS 180
SHEEP_COX2-----SYKSWEAFSNLSYYTRALPPVDDCPTPMGVKGRKELPDSKEVVKKVLLRRKFIPDPQGT 180
4PH9_1-----GYKSWEAFSNLSYYTRALPPVDDCPTPMGVKGNKELPDSKEVLEKVLRLRREFIPDPQGS 163
4COX_1-----GYKSWEAFSNLSYYTRALPPVDDCPTPMGVKGNKELPDSKEVLEKVLRLRREFIPDPQGS 163
3LN1_1-----GYKSWEAFSNLSYYTRALPPVDDCPTPMGVKGNKELPDSKEVLEKVLRLRREFIPDPQGS 163
4M11_1-----GYKSWEAFSNLSYYTRALPPVDDCPTPMGVKGNKELPDSKEVLEKVLRLRREFIPDPQGS 163
*****:*****:*****:*****:*****:*****:*****
Human_cox2-----NMMFAFFAQHFTHQFFKTDHKGPAFTNGLGHGVLDLNIYGETLARQKRLRLFKDGKMKY 240
SHEEP_COX2-----NLMFAFFAQHFTHQFFKTDIERGPAFTKGKNHGVLDLSHVYGESLERQHKLRLFKDGKMKY 240
4PH9_1-----NMMFAFFAQHFTHQFFKTDHKGPGFTRGLGHGVLDLNIYGETLDRQHKLRLFKDGKMKY 223
4COX_1-----NMMFAFFAQHFTHQFFKTDHKGPGFTRGLGHGVLDLNIYGETLDRQHKLRLFKDGKMKY 223
3LN1_1-----NMMFAFFAQHFTHQFFKTDHKGPGFTRGLGHGVLDLNIYGETLDRQHKLRLFKDGKMKY 223
4M11_1-----NMMFAFFAQHFTHQFFKTDHKGPGFTRGLGHGVLDLNIYGETLDRQHKLRLFKDGKMKY 223
*:*****:*****:*****:*****:*****:*****:*****
Human_cox2-----QIIDGEMYPPPTVKDTQAEIYPPQVPEHLRFVAVGQEVFGLVPGLMMYATIWLREHNRVCD 300
SHEEP_COX2-----QMINGEMYPPPTVKDTQVEIYPPHIPHLKFAVGQEVFGLVPGLMMYATIWLREHNRVCD 300
4PH9_1-----QVIGGEVYPPPTVKDTQVEIYPPHIPENLQFAVGQEVFGLVPGLMMYATIWLREHNRVCD 283

```

```

4COX_1-----QVIGGEVYPPTVKDTQVEMIYPPHIPENLQFAVGQEVFGLVPGLMYATIWLREHQRVCD 283
3LN1_1-----QVIGGEVYPPTVKDTQVEMIYPPHIPENLQFAVGQEVFGLVPGLMYATIWLREHNRVCD 283
4M11_1-----QVIGGEVYPPTVKDTQVEMIYPPHIPENLQFAVGQEVFGLVPGLMYATIWLREHNRVCD 283
               *:.*.*:*****.*****:.*.*:*****:*****:*****
Human_cox2----VLKQEHPEWGDEQLFQTSRLILIGETIKIVIEDYVQHLSGYHFKLKFDPPELLFNKQFQYQ 360
SHEEP_COX2----VLKQEHPEWGDEQLFQTSRLILIGETIKIVIEDYVQHLSGYHFKLKFDPPELLFNKQFQYQ 360
4PH9_1-----ILKQEHPEWGDEQLFQTSRLILIGETIKIVIEDYVQHLSGYHFKLKFDPPELLFNKQFQYQ 343
4COX_1-----ILKQEHPEWGDEQLFQTSRLILIGETIKIVIEDYVQHLSGYHFKLKFDPPELLFNKQFQYQ 343
3LN1_1-----ILKQEHPEWGDEQLFQTSRLILIGETIKIVIEDYVQHLSGYHFKLKFDPPELLFNKQFQYQ 343
4M11_1-----ILKQEHPEWGDEQLFQTSRLILIGETIKIVIEDYVQHLSGYHFKLKFDPPELLFNKQFQYQ 343
               :*****:*****:*****:*****:*****:*****:*****
Human_cox2----NRIAAEFNTLYHWHPLLPDFTQIHDQKYNYYQFIYNNSILLEHGITQFVESFTRQIAGRV 420
SHEEP_COX2----NRIAAEFNTLYHWHPLLPDVFQIDGQENYQFIYNNSVLEHGVTFVESFTRQIAGRV 420
4PH9_1-----NRIASEFNTLYHWHPLLPDFTFNIEDQEYSFKQFLYNNSILLEHGLTQFVESFTRQIAGRV 403
4COX_1-----NRIASEFNTLYHWHPLLPDFTFNIEDQEYSFKQFLYNNSILLEHGLTQFVESFTRQIAGRV 403
3LN1_1-----NRIASEFNTLYHWHPLLPDFTFNIEDQEYSFKQFLYNNSILLEHGLTQFVESFTRQIAGRV 403
4M11_1-----NRIASEFNTLYHWHPLLPDFTFNIEDQEYSFKQFLYNNSILLEHGLTQFVESFTRQIAGRV 403
               *****:.*.*:.*.*:.*.*:.*.*:*****:*****
Human_cox2----AGGRNVPPAVQKVSQASIDQSRQMKYQSFNEYRKRFLKPYESFEELTGEKEMSAEELAL 480
SHEEP_COX2----AGGRNLPAAVEKVSQASLDQSRQMKYQSFNEYRKRFLKPYESFEELTGEKEMAAELAL 480
4PH9_1-----AGGRNVPIAVQAVAKASIDQSRQMKYQSLNEYRKRFSLKPYTSFEELTGEKEMAAELKAL 463
4COX_1-----AGGRNVPIAVQAVAKASIDQSRQMKYQSLNEYRKRFSLKPYTSFEELTGEKEMAAELKAL 463
3LN1_1-----AGGRNVPIAVQAVAKASIDQSRQMKYQSLNEYRKRFSLKPYTSFEELTGEKEMAAELKAL 463
4M11_1-----AGGRNVPIAVQAVAKASIDQSRQMKYQSLNEYRKRFSLKPYTSFEELTGEKEMAAELKAL 463
               *****:.*.*:.*.*:.*.*:.*.*:*****:*****
Human_cox2----YGDIDAVELYPALLVEKPRPDALFGETMVELGAPFSLKGLMGNVICSPAYWKPSTFGGEV 540
SHEEP_COX2----YGDIDAMELYPALLVEKPRPDALFGETMVEAGAPFSLKGLMGNPICSPYWKPSTFGGEV 540
4PH9_1-----YSDIDVMELYPALLVEKPRPDALFGETMVELGAPFSLKGLMGNPICSPQYWKPSTFGGEV 523
4COX_1-----YSDIDVMELYPALLVEKPRPDALFGETMVELGAPFSLKGLMGNPICSPQYWKPSTFGGEV 523
3LN1_1-----YSDIDVMELYPALLVEKPRPDALFGETMVELGAPFSLKGLMGNPICSPQYWKPSTFGGEV 523
4M11_1-----YSDIDVMELYPALLVEKPRPDALFGETMVELGAPFSLKGLMGNPICSPQYWKPSTFGGEV 523
               *.***:.*.*:.*.*:.*.*:.*.*:*****:*****
Human_cox2----GFKIINTASIQSLICNNVKGCPFTSFVSDPELIKTVTINASSSRSGLDLDINPTVLLKER 600
SHEEP_COX2----GFKIINTASIQSLICNNVKGCPFTSFVSDAHLTKTVTINASSSHSGLDLDINPTVLLKER 600
4PH9_1-----GFKIINTASIQSLICNNVKGCPFTSFNV----- 551
4COX_1-----GFKIINTASIQSLICNNVKGCPFTSFNVQDPQPTKTATINASASHSRLLDINPTVLIKRR 583
3LN1_1-----GFKIINTASIQSLICNNVKGCPFTSFNVQDPQPTKTATINASASHSRLLDINPTVLIKRR 583
4M11_1-----GFKIINTASIQSLICNNVKGCPFTSFNVQ----- 552
               **:*****.*****.*
Human_cox2-----STEL 604
SHEEP_COX2-----STEL 604
4PH9_1----- 551
4COX_1-----STEL 587
3LN1_1-----STEL 587
4M11_1----- 552

```

**Figure S2.** Comparative sequence analysis for COX-2. The aminoacid residues inside box line black

## Results docking molecular

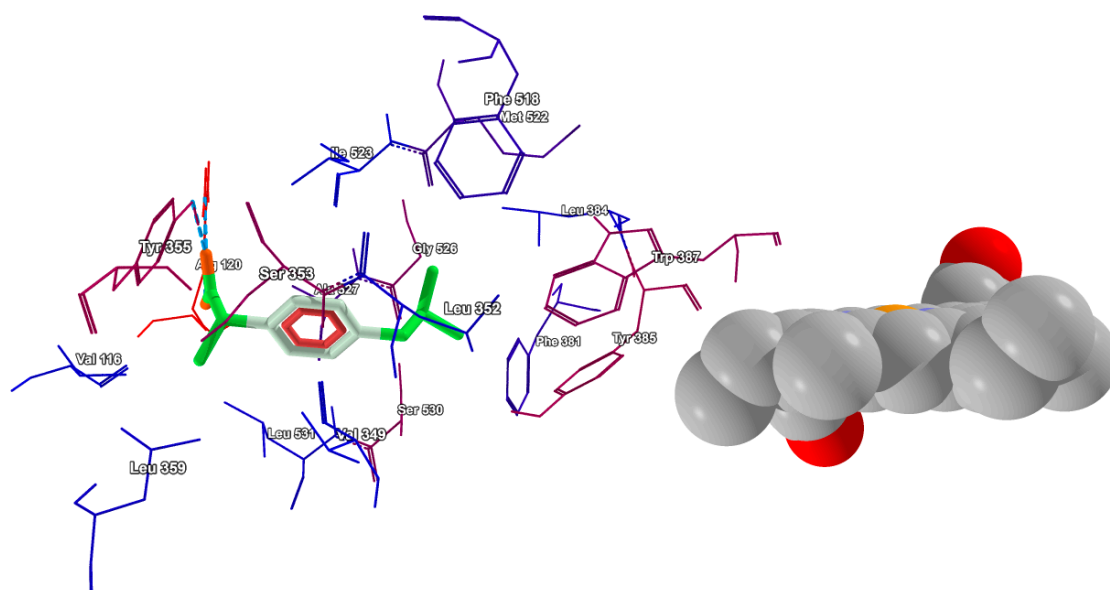

**Figure S3.** Binding mode of Ibuprofen in 1EQG crystal (COX-1).

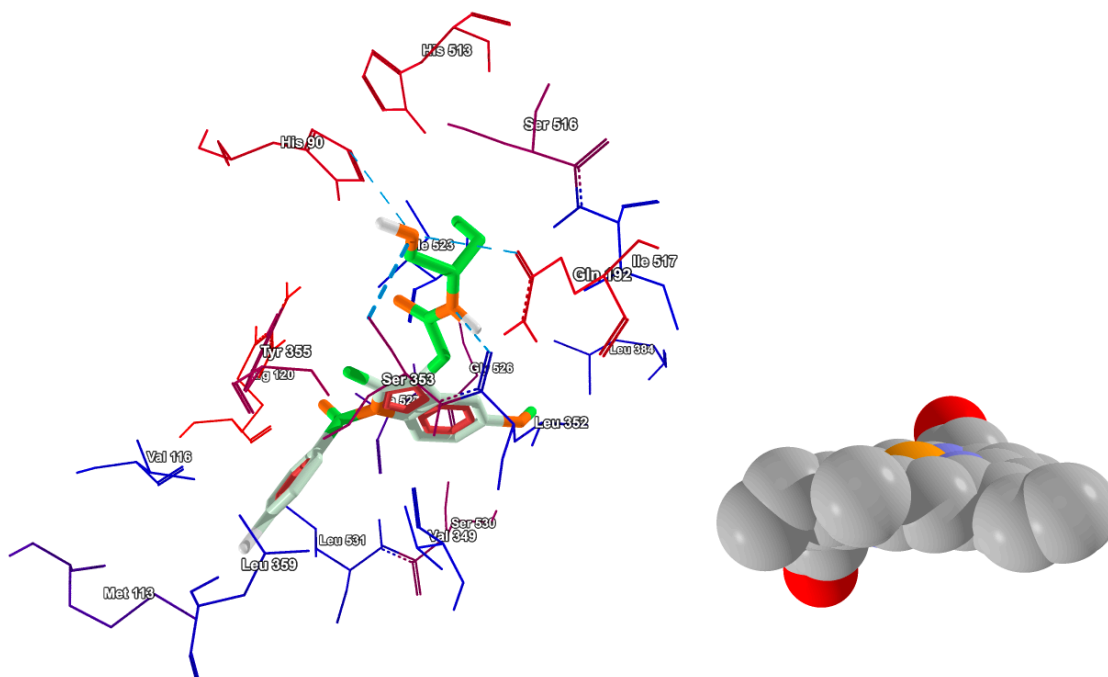

**Figure S4.** Binding mode of Ibuprofen in 2OYU crystal (COX-1).

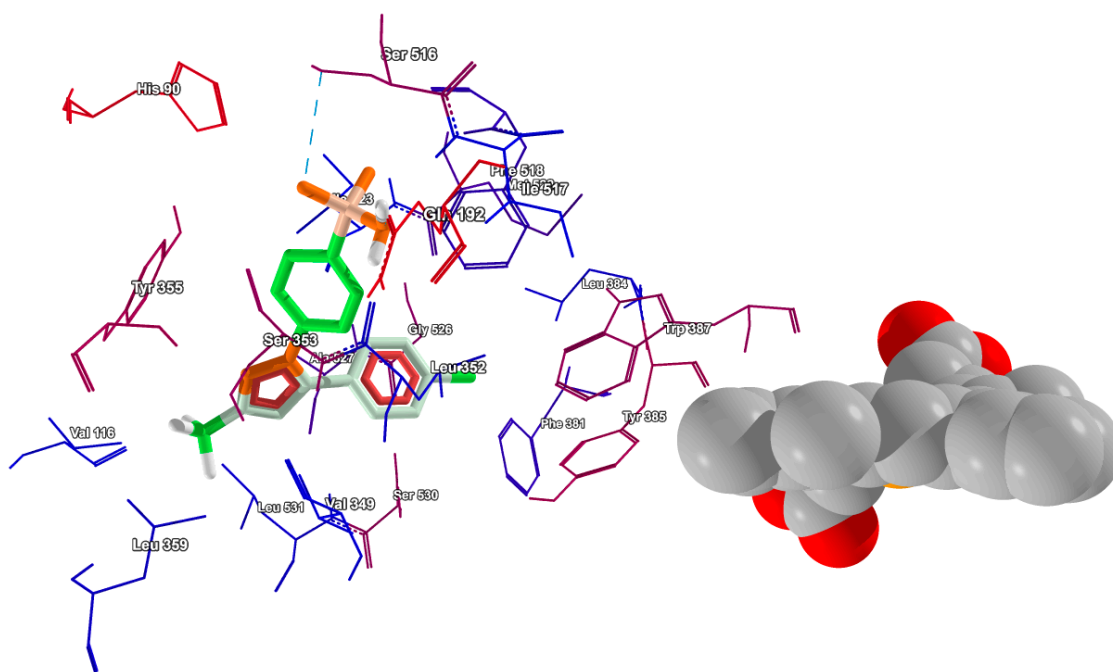

**Figure S5.** Binding mode of Ibuprofen in 3KK6 crystal (COX-1).

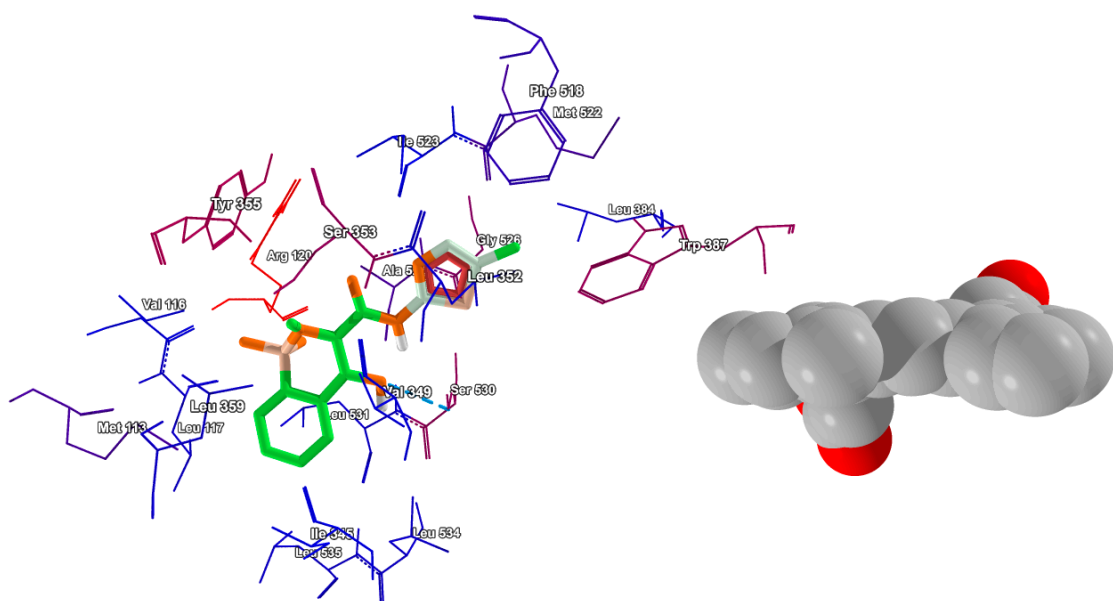

**Figure S6.** Binding mode of Ibuprofen in 4O1Z crystal (COX-1).

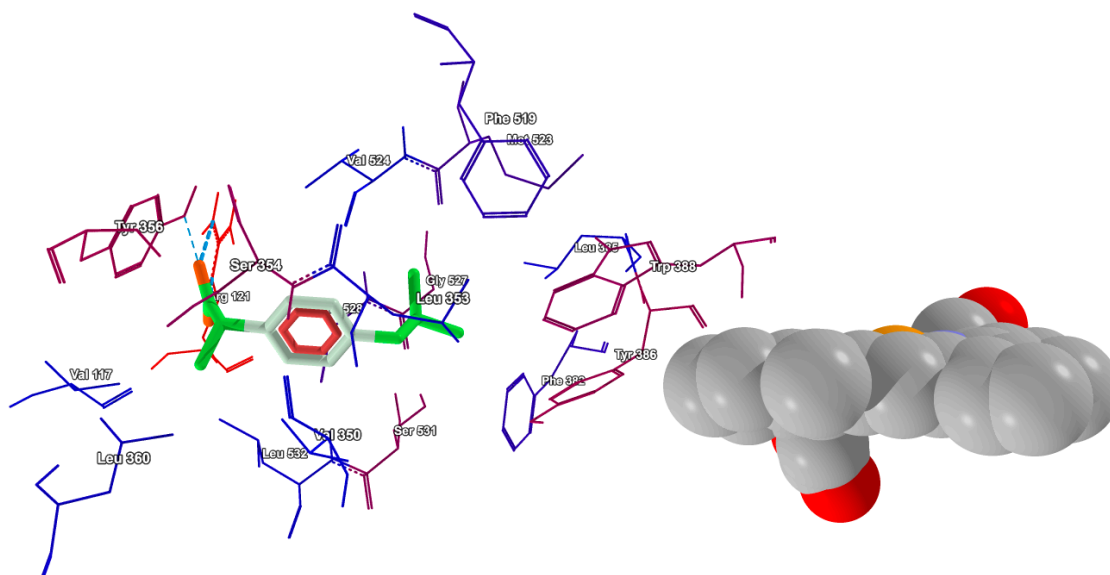

**Figure S7.** Binding mode of Ibuprofen in 4PH9 crystal (COX-2).

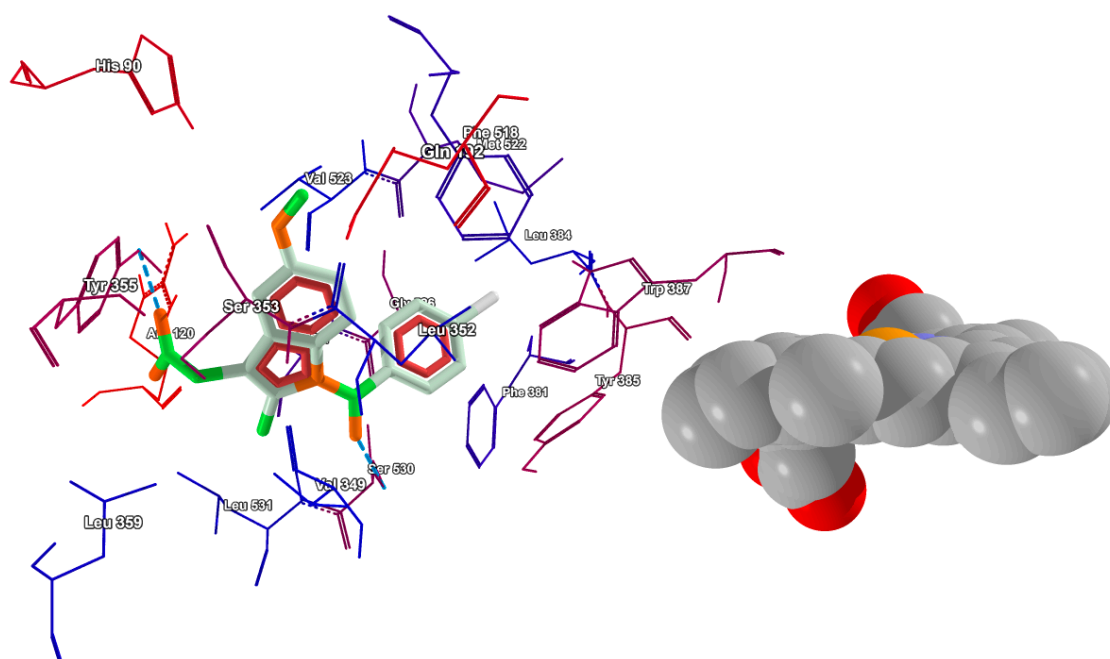

**Figure S8.** Binding mode of Indomethacin in 4COXcrystal (COX-2).

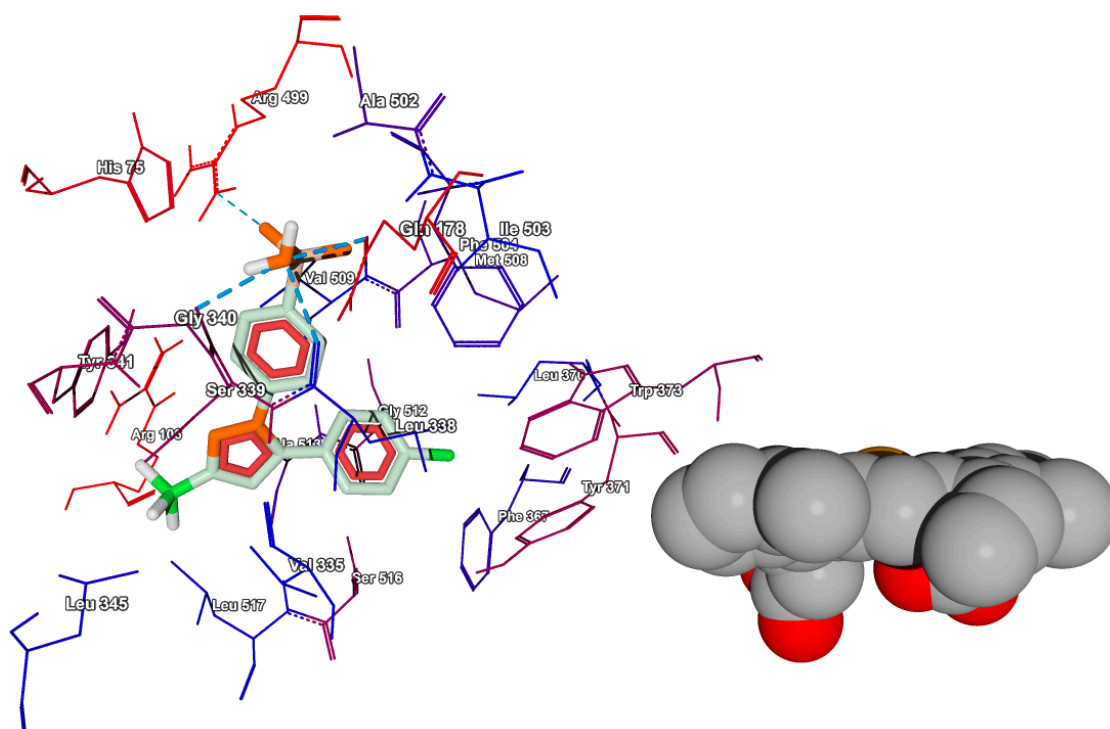

**Figure S9.** Binding mode of Celecoxib in 3LN1 crystal (COX-2).

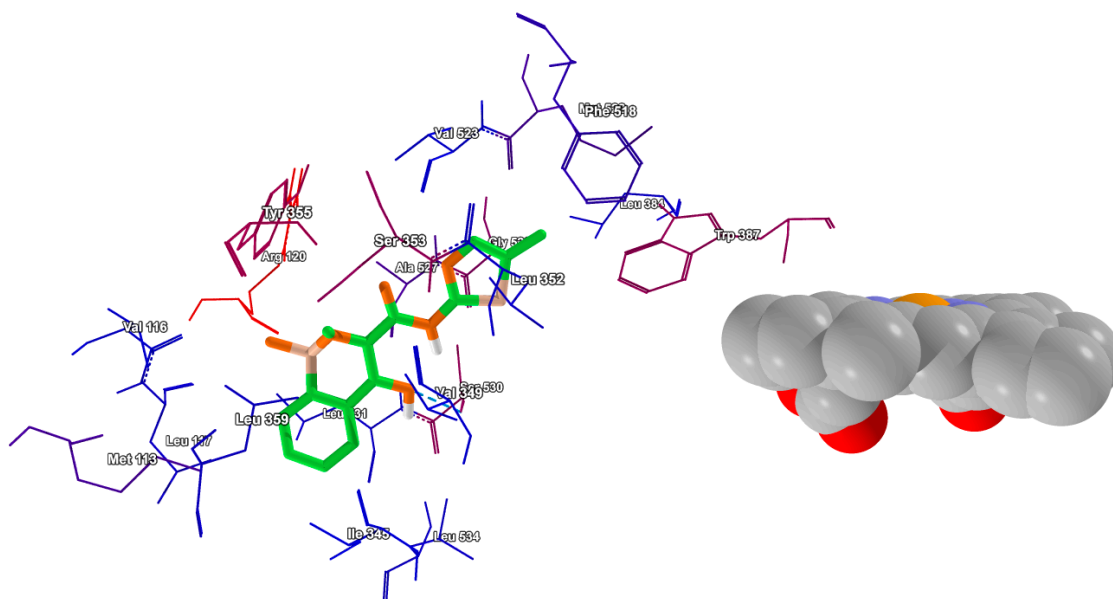

**Figure S10.** Binding mode of Meloxicam in 4M11 crystal (COX-2).

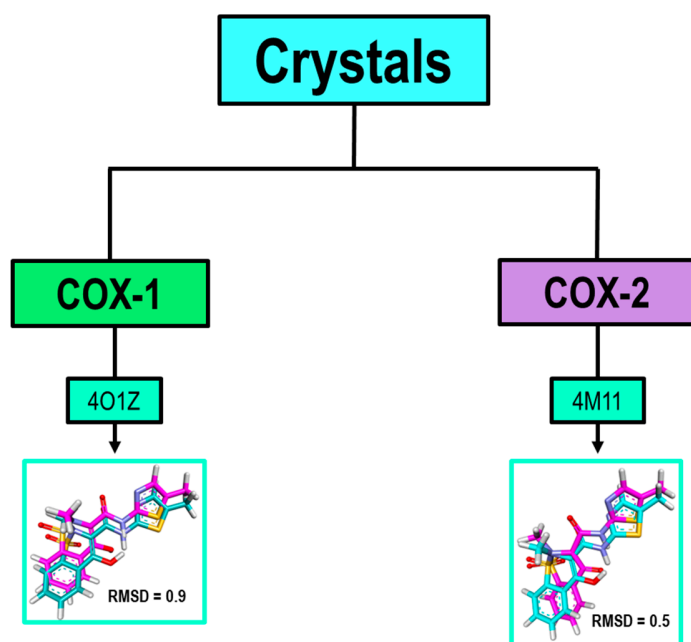

**Figure S11.** RMSD values obtained of structural validation of computational model with **Meloxicam** (Magenta) presented a parallel orientation of the nitrogen atom of the thiazole ring to the carbonyl of the amide original pose and color pose obtained in the molecule after experiment as show: Meloxicam (cyan).

## Anti-inflammatory compound

**Table S1.** IC<sub>50</sub> Values of NSAIDs and anti-inflammatory compounds.

| Compounds  | IC <sub>50</sub> values (μM) |       | Compounds   | IC <sub>50</sub> values (μM) |            |
|------------|------------------------------|-------|-------------|------------------------------|------------|
|            | COX-1                        | COX-2 |             | COX-1                        | COX-2      |
| MW: 244.27 | 0.59                         | 3.1   | MW: 263.13- | 1.8                          | 2.1        |
| MW: 381.08 | 50                           | 0.28  | MW: 271.07  | 78.7 ± 3.60                  | 0.3 ± 0.04 |
| MW: 357.08 | 0.13                         | 5.7   | MW: 349.08  | 1.92 ± 0.9                   | 8.21 ± 1.6 |



|                                                                                                          |             |             |                                                                                                        |        |       |
|----------------------------------------------------------------------------------------------------------|-------------|-------------|--------------------------------------------------------------------------------------------------------|--------|-------|
| 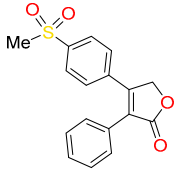 <p>MW: 314.06</p>      | 100         | 0.39        |  <p>MW: 413.06</p>   | 12.95  | 0.05  |
|  <p>MW: 295.02</p>      | 18.79       | 1.24        |  <p>MW: 277.09</p>   | 159.72 | 0.196 |
|  <p>MW: 307.04</p>      | 9.2         | 0.52        |  <p>MW: 280.15</p>   | 0.1    | 0.06  |
|  <p>MW: 353.05</p>      | 19.4        | 1.37        |  <p>MW: 294.16</p>   | 11.4   | 7.7   |
|  <p>MW: 206.13</p>     | 2.9         | 1.1         |  <p>MW: 270.16</p>  | 0.8    | 2.1   |
|  <p>MW: 329.13 30</p> | 7.89        | 0.98        |  <p>MW: 280.15</p> | 0.7    | 0.2   |
|  <p>MW: 250.03</p>    | 15.1 ± 0.94 | 19.2 ± 1.80 |  <p>MW: 280.15</p> | 2.8    | 0.9   |
|  <p>MW: 266.13</p>    | 0.6         | 2.7         |                                                                                                        |        |       |

## Interaction energy values (Kcal/mol) of COXs inhibitors

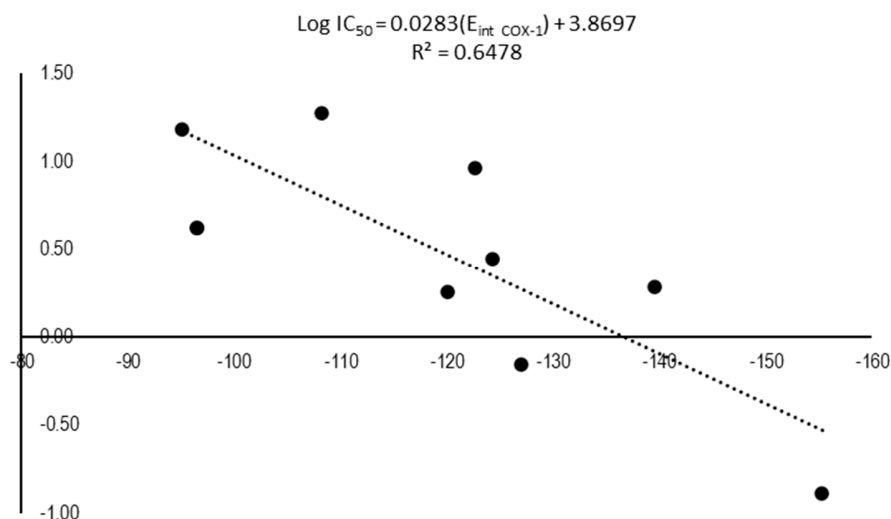

Figure S12.

**Table S2.** Interaction energy values (Kcal/mol) of COX-1 inhibitors that were coupled to the 1EQG crystal. Log IC<sub>50</sub> exp, Log IC<sub>50</sub> calc and delta error ( $\Delta$  error) values as show.

| Compounds              | Energy  | Log IC <sub>50</sub> exp | Log IC <sub>50</sub> calc | $\Delta$ error |
|------------------------|---------|--------------------------|---------------------------|----------------|
| Ibuprofen <sup>1</sup> | -96.57  | 0.61                     | 1.14                      | 0.53           |
| 13                     | -120.03 | 0.26                     | 0.47                      | 0.21           |
| 19                     | -127.04 | -0.15                    | 0.27                      | 0.12           |
| 20                     | -124.25 | 0.45                     | 0.35                      | -0.1           |
| 29                     | -139.49 | 0.28                     | -0.08                     | -0.36          |
| 34                     | -95.09  | 1.18                     | 1.18                      | 0              |
| Diclofenac             | -108.23 | 1.27                     | 0.81                      | -0.46          |
| Indomethacine          | -155.27 | -0.89                    | -0.52                     | -1.41          |
| Nimesulide             | -122.59 | 0.96                     | 0.40                      | -0.56          |

<sup>1</sup> Ligand corresponding to the crystal.

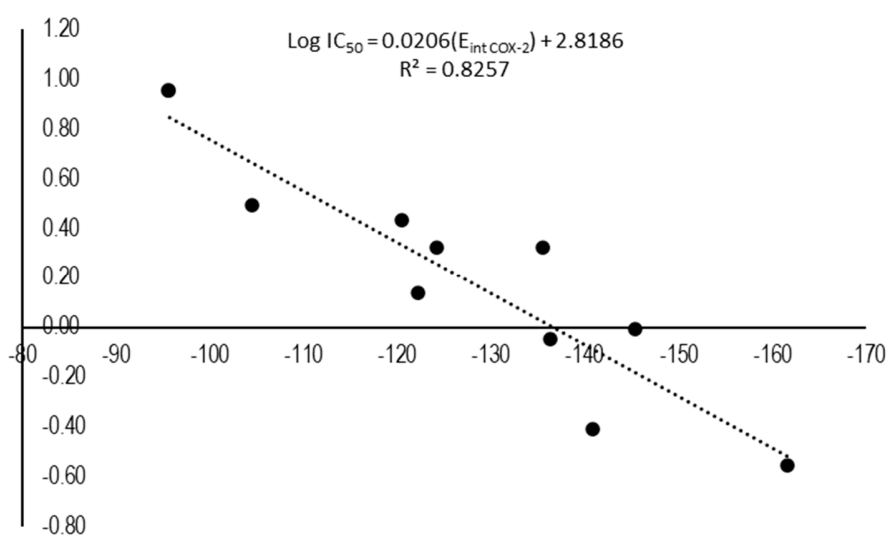

Figure S13.

**Table S3.** Interaction energy values (Kcal/mol) of COX-2 inhibitors that were coupled to the 4PH9 crystal. Log IC<sub>50 exp</sub>, Log IC<sub>50 calc</sub> and delta error (Δ error) values as show.

| Compounds              | Energy  | Log IC <sub>50 exp</sub> | Log IC <sub>50 calc</sub> | Δ error |
|------------------------|---------|--------------------------|---------------------------|---------|
| Ibuprofen <sup>1</sup> | -95.66  | 0.95                     | 0.85                      | -0.1    |
| 13                     | -135.53 | 0.32                     | 0.03                      | -0.29   |
| 16                     | -124.25 | 0.32                     | 0.26                      | -0.06   |
| 20                     | -136.32 | -0.05                    | 0.01                      | 0.06    |
| 21                     | -120.5  | 0.43                     | 0.34                      | -0.09   |
| 30                     | -145.4  | -0.01                    | -0.18                     | -0.17   |
| Celecoxib              | -161.57 | -0.55                    | -0.51                     | 0.04    |
| Flurbiprofen           | -104.45 | 0.49                     | 0.67                      | 0.18    |
| Meloxicam              | -122.27 | 0.14                     | 0.30                      | 0.16    |

<sup>1</sup> Ligand corresponding to the crystal.

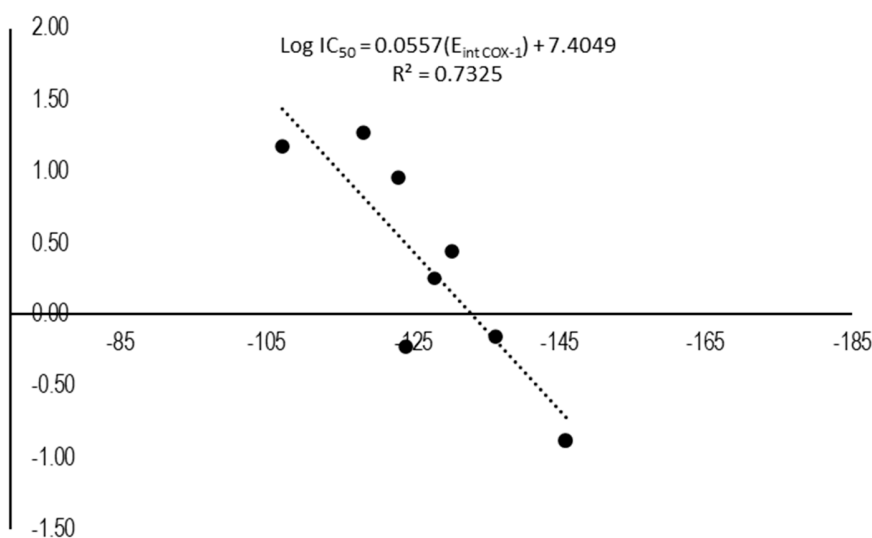

**Figure S14.**

**Table S4.** Interaction energy values (Kcal/mol) of COX-1 inhibitors that were coupled to the 2OYU crystal. Log IC<sub>50 exp</sub>, Log IC<sub>50 calc</sub> and delta error (Δerror) values as show.

| Compounds                 | Energy  | Log IC <sub>50 exp</sub> | Log IC <sub>50 calc</sub> | Δ error |
|---------------------------|---------|--------------------------|---------------------------|---------|
| Indomethacin <sup>1</sup> | -145.91 | -0.89                    | -0.72                     | 0.17    |
| 13                        | -127.84 | 0.26                     | 0.28                      | 0.02    |
| 19                        | -136.29 | -0.15                    | -0.19                     | -0.04   |
| 20                        | -130.2  | 0.45                     | 0.15                      | -0.3    |
| 21                        | -123.93 | -0.22                    | 0.50                      | 0.72    |
| 34                        | -107.02 | 1.18                     | 1.44                      | 0.26    |
| Diclofenac                | -118.2  | 1.27                     | 0.82                      | -0.45   |
| Nimesulide                | -122.99 | 0.96                     | 0.55                      | -0.41   |

<sup>1</sup> Ligand corresponding to the crystal.

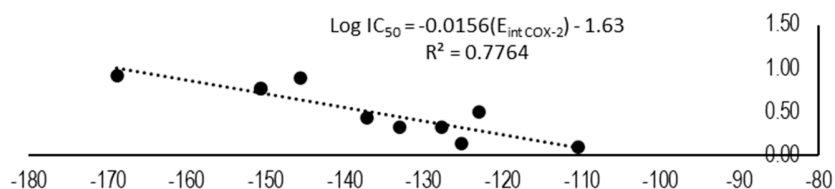

Figure S15.

**Table S5.** Interaction energy values (Kcal/mol) of COX-2 inhibitors that were coupled to the 4COX crystal. Log IC<sub>50</sub> exp, Log IC<sub>50</sub> calc and delta error (Δ error) values as show.

| Compounds                 | Energy  | Log IC <sub>50</sub> exp | Log IC <sub>50</sub> calc | Δ error |
|---------------------------|---------|--------------------------|---------------------------|---------|
| Indomethacin <sup>1</sup> | -150.6  | 0.76                     | 0.72                      | -0.04   |
| 13                        | -127.7  | 2.1                      | 2.0                       | -0.1    |
| 15                        | -145.69 | 0.89                     | 0.64                      | -0.25   |
| 16                        | -133.07 | 0.32                     | 0.45                      | 0.13    |
| 21                        | -137.15 | 0.43                     | 0.51                      | 0.08    |
| 29                        | -168.87 | 0.91                     | 1.00                      | 0.09    |
| Diclofenac                | -110.47 | 0.09                     | 0.09                      | 0       |
| Flurbiprofen              | -123.05 | 0.49                     | 0.29                      | -0.2    |

<sup>1</sup> Ligand corresponding to the crystal.

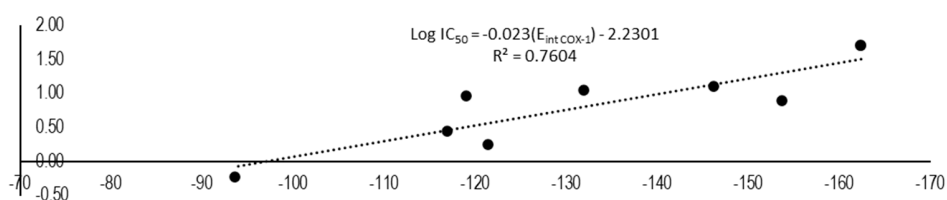

Figure S16.

**Table S6.** Interaction energy values (Kcal/mol) of COX-1 inhibitors that were coupled to the 3KK6 crystal. Log IC<sub>50</sub> exp, Log IC<sub>50</sub> calc and delta error (Δ error) values as show.

| Compounds              | Energy  | Log IC <sub>50</sub> exp | Log IC <sub>50</sub> calc | Δ error |
|------------------------|---------|--------------------------|---------------------------|---------|
| Celecoxib <sup>1</sup> | -162.39 | 1.70                     | 1.51                      | -0.19   |
| 13                     | -121.38 | 0.26                     | 0.56                      | 0.3     |
| 15                     | -131.88 | 1.06                     | 0.80                      | -0.26   |
| 20                     | -116.91 | 0.45                     | 0.46                      | 0.01    |
| 26                     | -146.17 | 1.11                     | 1.13                      | 0.02    |
| 30                     | -153.73 | 0.90                     | 1.31                      | 0.41    |
| Flurbiprofen           | -93.58  | -0.23                    | -0.08                     | 0.15    |
| Nimesulide             | -119.00 | 0.96                     | 0.51                      | -0.45   |

<sup>1</sup> Ligand corresponding to the crystal.

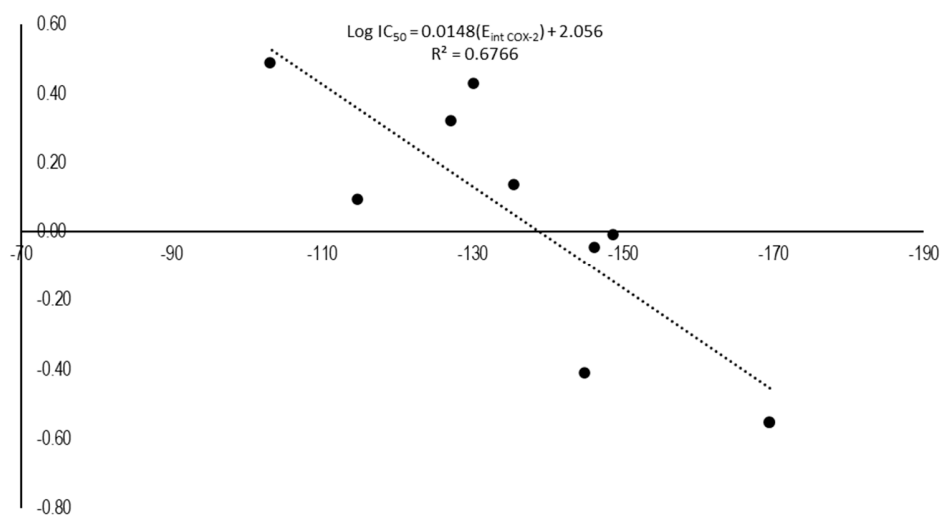

Figure S17.

**Table S7.** Interaction energy values (Kcal/mol) of COX-2 inhibitors that were coupled to the 3LN1 crystal. Log IC<sub>50 exp</sub>, Log IC<sub>50 calc</sub> and delta error ( $\Delta$  error) values as show.

| Compounds              | Energy  | Log IC <sub>50 exp</sub> | Log IC <sub>50 calc</sub> | $\Delta$ error |
|------------------------|---------|--------------------------|---------------------------|----------------|
| Celecoxib <sup>1</sup> | -169.55 | -0.55                    | -0.45                     | 0.1            |
| 16                     | -127.07 | 0.32                     | 0.18                      | -0.14          |
| 20                     | -146.17 | -0.05                    | -0.11                     | -0.06          |
| 21                     | -130.13 | 0.43                     | 0.13                      | 0.3            |
| 30                     | -148.72 | -0.01                    | -0.15                     | -0.14          |
| Diclofenac             | -114.72 | 0.09                     | 0.36                      | 0.27           |
| Flurbiprofen           | -103.01 | 0.49                     | 0.53                      | 0.04           |
| Meloxicam              | -135.43 | 0.14                     | 0.05                      | -0.09          |
| Rofecoxib              | -144.84 | -0.41                    | -0.09                     | 0.32           |

<sup>1</sup> Ligand corresponding to the crystal.

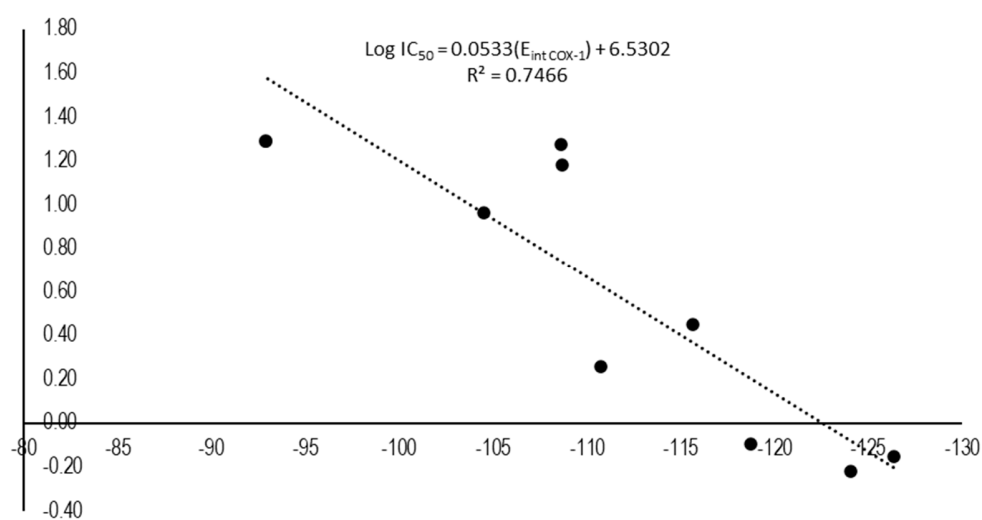

Figure S18.

**Table S8.** Interaction energy values (Kcal/mol) of COX-1 inhibitors that were coupled to the 4O1Z crystal. Log IC<sub>50</sub> exp, Log IC<sub>50</sub> calc and delta error (Δerror) values as show.

| Compounds              | Energy   | Log IC <sub>50</sub> exp | Log IC <sub>50</sub> calc | Δ error |
|------------------------|----------|--------------------------|---------------------------|---------|
| Meloxicam <sup>1</sup> | -92.91   | 0.96                     | 1.58                      | 0.62    |
| 13                     | -110.750 | 0.26                     | 0.63                      | 0.37    |
| 16                     | -118.69  | -0.10                    | 0.20                      | 0.3     |
| 19                     | -126.32  | -0.15                    | -0.20                     | -0.05   |
| 20                     | -115.64  | 0.45                     | 0.37                      | -0.08   |
| 21                     | -124.05  | -0.22                    | -0.08                     | 0.14    |
| 34                     | -108.68  | 1.18                     | 0.74                      | -0.44   |
| Diclofenac             | -108.64  | 1.27                     | 0.74                      | -0.53   |
| Nimesulide             | -104.48  | 0.96                     | 0.96                      | 0       |

<sup>1</sup> Ligand corresponding to the crystal.

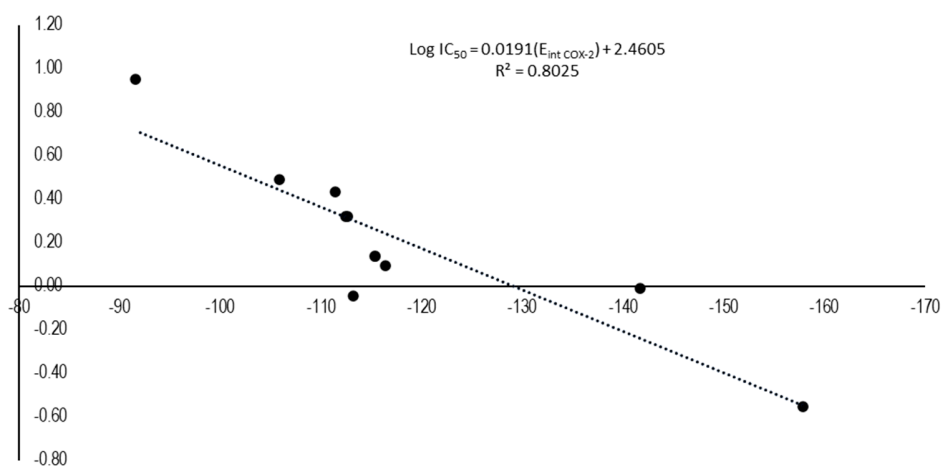

**Figure S19.**

**Table S9.** Interaction energy values (Kcal/mol) of COX-2 inhibitors that were coupled to the 4M11 crystal. Log IC<sub>50</sub> exp, Log IC<sub>50</sub> calc and delta error (Δ error) values as show.

| Compounds              | Energy  | Log IC <sub>50</sub> exp | Log IC <sub>50</sub> calc | Δ error |
|------------------------|---------|--------------------------|---------------------------|---------|
| Meloxicam <sup>1</sup> | -115.40 | 0.14                     | 0.26                      | 0.12    |
| 13                     | -112.49 | 0.32                     | 0.31                      | -0.01   |
| 16                     | -112.64 | 0.32                     | 0.31                      | -0.01   |
| 20                     | -113.17 | -0.05                    | 0.30                      | 0.35    |
| 21                     | -111.41 | 0.43                     | 0.33                      | -0.1    |
| 30                     | -141.68 | -0.01                    | -0.25                     | -0.24   |
| Celecoxib              | -157.82 | -0.55                    | -0.55                     | 0       |
| Diclofenac             | -116.44 | 0.09                     | 0.24                      | 0.15    |
| Flurbiprofen           | -105.91 | 0.49                     | 0.44                      | -0.05   |
| Ibuprofen              | -91.59  | 0.95                     | 0.71                      | -0.24   |

<sup>1</sup> Ligand corresponding to the crystal.

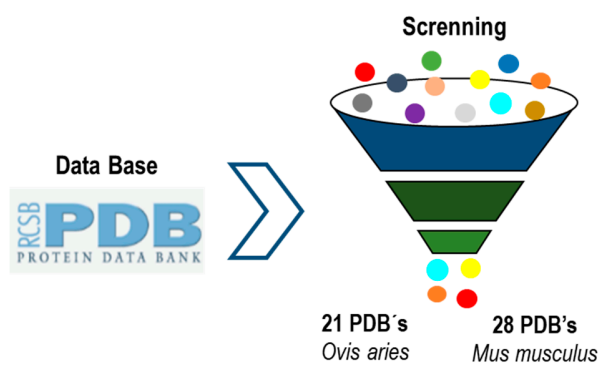

**Figure S20.** Search of crystals from COX-1 and COX-2.

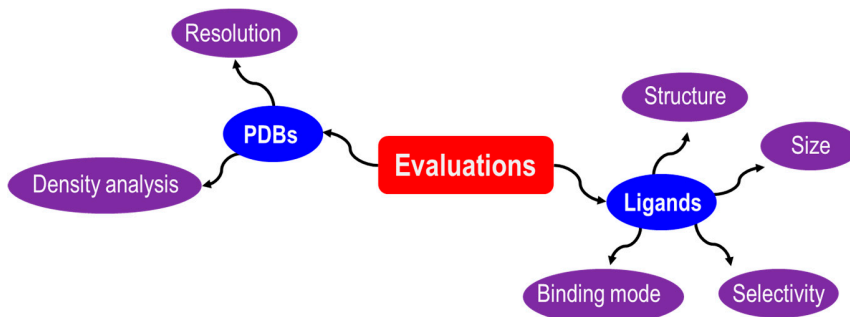

**Figure S21.** Analysis of crystals COXs with respect PDB and Ligands.

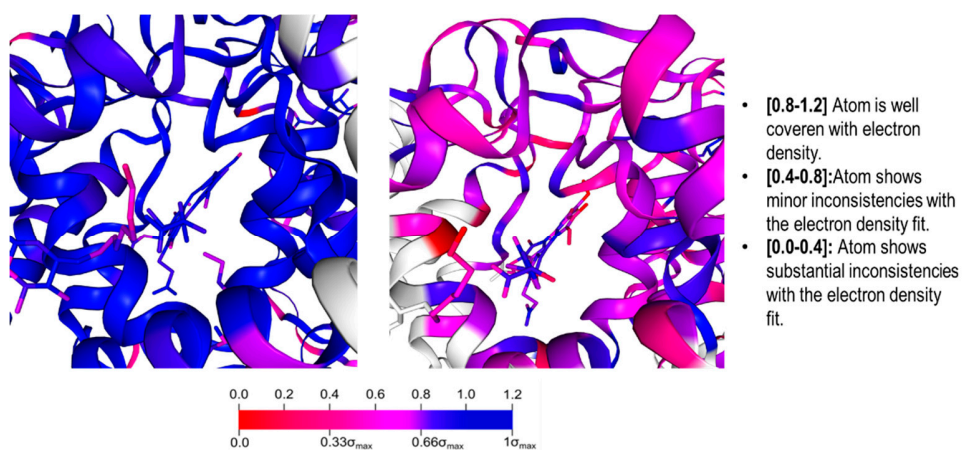

**Figure S22.** Examples of analysis about active site in crystals of COX-1 with EDIA. a) Ibuprofen (4PH9) with resolution of 2.6 Å, b) Flurbiprofen (3N8Z) with resolution of 2.9 Å.

## Crystals selections

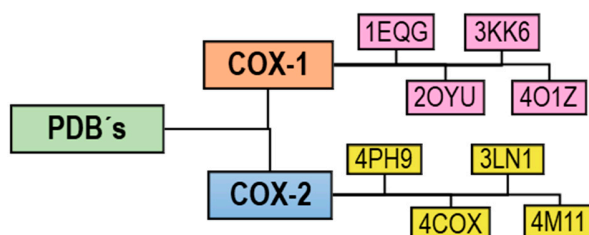

**Figure S23.** Final selection of crystals from computational model.

**Table S10.** Crystals and their flexible residues shown in the flexible docking.

| PDBs                | Flexible residues                                                                                                                               |
|---------------------|-------------------------------------------------------------------------------------------------------------------------------------------------|
| <b>1EQG (COX-1)</b> | Phe381, Phe518, Ser353, Ser530, Trp387, Tyr355, Val116, Val349, Arg120, Ile523, Leu 352 Leu359, Leu531, Met522.                                 |
| <b>4PH9 (COX-2)</b> | Phe519, Ser354, Ser531, Trp388, Tyr356, Tyr386, Val117, Val350, Val524, Arg121, Leu353, Leu360, Leu532, Met523.                                 |
| <b>2OYU (COX-1)</b> | Leu531, Leu359, Leu352, Ile523, Ile517, Arg120, Val349, Tyr355, Gln192, Ser530, Ser516, Ser353.                                                 |
| <b>4COX (COX-2)</b> | Phe381, Phe518, Ser353, Ser530, Trp387, Tyr355, Tyr385, Val349, Val523, Arg120, Leu352, Leu384, Leu531, Met522.                                 |
| <b>3KK6 (COX-1)</b> | His90, Phe381, Phe518, Ser353, Ser516, Ser530, Trp387, Gln192, Tyr355, Val116, Val349, Ile517, Ile523, Leu352, Leu359, Leu531, Met522.          |
| <b>3LN1 (COX-2)</b> | His75, Phe367, Phe504, Ser339, Ser516, Trp373, Gln178, Tyr341, Tyr371, Val335, Val509, Arg499, Leu338, Leu345, Leu370, Leu517.                  |
| <b>4O1Z (COX-1)</b> | Ser353, Ser530, Trp387, Tyr355, Val116, Val349, Arg120, Ile345, Ile523, Leu117, Leu352, Leu359, Leu384, Leu531, Leu534, Leu535, Met113, Met522. |
| <b>4M11 (COX-2)</b> | Phe518, Ser530, Trp387, Tyr355, Val349, Val523, Arg120, Ile345, Leu117, Leu352, Leu359, Leu531, Leu534, Met113, Met522.                         |
